# Supplementary material for: HPV16 E7 Nucleotide Variants Found in Cancer-Free Subjects Affect E7 Protein Expression and Transformation
Source: Preprints.org preprint supplement (doi:10.20944/preprints202111.0134.v1), 2021-11-08
Supplement: Supplementary file 2 [file SuppTables.xlsx]

## Sheet: Table S1_primers
Table 1. Oligonucleotide primers
Oligo Name	Sequence (5' to 3')
Oligonucleotides used for pcDNA3.1+IRESGFP_HPV16E7
RecBamHI_HPV16-A1E7_Rev.	5'-CCACACTGGACTAGT GGATCC TTATGGTTTCTGAGAACAGATGGGGCA-3'
RecNehI_HPV16-A1E7_For	5'-GGGAGACCCAAGCTG GCTAGC GCCACCATGCATGGAGATACACCTACATTG-3'
Oligonucleotides used for CloneEZ® PCR Cloning
HPV16E7P6LFor	5'-GGGAGACCCAAGCTGGCTAGCGCCACCATGCATGGAGATACACTTACATTGCATGAATATATG-3'
HPV16E7H9RFor	5'-GGGAGACCCAAGCTGGCTAGCGCCACCATGCATGGAGATACACCTACATTGCGTGAATATATG-3'
HPV16E7D14EFor	5'-GGGAGACCCAAGCTGGCTAGCGCCACCATGCATGGAGATACACCTACATTGCATGAATATATGTTAGAATTGCAACCAGAG-3'
HPV16E7D21NFor	5'-GGGAGACCCAAGCTGGCTAGCGCCACCATGCATGGAGATACACCTACATTGCATGAATATATGTTAGATTTGCAACCAGAGACAACTAATCTCTACTG-3'
HPV16E7P92SRev	5'-CCACACTGGACTAGTGGATCCTTATGGTTTCTGAGAACAGATGGAGCACACAATTCC-3'
HPV16E7P92LRev	5'-CCACACTGGACTAGTGGATCCTTATGGTTTCTGAGAACAGATGAGGCACACAATTCC-3'
HPV16E7D81NRev	5'-CCACACTGGACTAGTGGATCCTTATGGTTTCTGAGAACAGATGGGGCACACAATTCCTAGTGTGCCCATTAACAGGTTTTCCAAAGTACG-3'
HPV16E7E80KRev	5'-CCACACTGGACTAGTGGATCCTTATGGTTTCTGAGAACAGATGGGGCACACAATTCCTAGTGTGCCCATTAACAGGTCTTTCAAAGTACG-3'
HPV16E7R77SRev	5'-CCACACTGGACTAGTGGATCCTTATGGTTTCTGAGAACAGATGGGGCACACAATTCCTAGTGTGCCCATTAACAGGTCTTCCAAAGTACTAATGTCTACG-3'
Oligonucleotides used for site-directed mutagenesis
HPV16E7N29H_Rev	5'-ctctgagctgtcatgtaattgctcataacagtagagatcag-3'
HPV16E7N29H_For	5'-ctgatctctactgttatgagcaattacatgacagctcagag-3'
HPV16E7N29S_Rev	5'-ctctgagctgtcatctaattgctcataacagtagagatcag-3'
HPV16E7N29S_For	5'-ctgatctctactgttatgagcaattagatgacagctcagag-3
HPV16E7H51N_Rev	5'-aaggttacaatattgtaattggctctgtccggttctgc-3'
HPV16E7H51N_For	5'-gcagaaccggacagagccaattacaatattgtaacctt-3'
HPV16E7E33K_Rev	5'-ttcatcctcctcctttgagctgtcatttaattgctcataaca-3'
HPV16E7E33K_For	5'-tgttatgagcaattaaatgacagctcaaaggaggaggatgaa-3'
HPV16E7T56I_Rev	5'-gagtcacacttgcaacaaaagattacaatattgtaatgggctct-3'
HPV16E7T56I_For	5'-agagcccattacaatattgtaatcttttgttgcaagtgtgactc-3'
HPV16E7D62N_Rev	5'-ccgaagcgtagagttacacttgcaacaaaaggttacaatatt-3'
HPV16E7D62N_For	5'-aatattgtaaccttttgttgcaagtgtaactctacgcttcgg-3'
HPV16E7S63F_Rev	5'-cgcacaaccgaagcgtaaagtcacacttgcaacaa-3'
HPV16E7S63F_For	5'-ttgttgcaagtgtgactttacgcttcggttgtgcg-3'
HPV16E7S63P_Rev	5'-gcacaaccgaagcgtagggtcacacttgcaacaaa-3'
HPV16E7S63P_For	5'-tttgttgcaagtgtgaccctacgcttcggttgtgc-3'
HPV16E7T64M_Rev	5'-acgcacaaccgaagcatagagtcacacttgcaac-3'
HPV16E7T64M_For	5'-gttgcaagtgtgactctatgcttcggttgtgcgt-3'

## Sheet: Table S2_HPV16E7 Ab
Table 2. HPV16E7 pcDNA clones and antibodies tested
	Description of product	Catalog No.	Company
Positive controls	CMV 16 E7	13686	Addgene
	CMV 16 E7 C91S	13689	Addgene
	CMV 16 E7 del DLYC	13687	Addgene
Vector for constructing full length HPV16 E7	pcDNA3.1 (+) IRES GFP	51406	Addgene
Testing antibodies	HPV16 E7 (716-325)	sc-51951	Santa Cruz
	HPV16 E7 (ED17)	sc-6981	Santa Cruz
	HPV16 E7 (8C9)	28-0006	Invitrogen
